# Supplementary material
Source: PubMed Central journal article supplement (PMC3753066)
Supplement: NIHMS489579-supplement-1.pdf [file NIHMS489579-supplement-1.pdf]

## Supplementary Information

### Engineered Nanostructured $\beta$ -Sheet Peptides Protect Membrane Proteins

Houchao Tao,<sup>1,5</sup> Sung Chang Lee,<sup>1,5</sup> Arne Moeller,<sup>1,2,5</sup> Rituparna Sinha Roy,<sup>1,4</sup> Fai Yiu Siu,<sup>1</sup> Jörg Zimmermann,<sup>3</sup> Raymond C. Stevens,<sup>1</sup> Clinton S. Potter,<sup>1,2</sup> Bridget Carragher<sup>1,2</sup> and Qinghai Zhang<sup>1</sup>

<sup>1</sup>Department of Integrative Structural and Computational Biology, 10550 North Torrey Pines Road, La Jolla, California, USA. <sup>2</sup>The National Resource for Automated Molecular Microscopy, 10550 North Torrey Pines Road, La Jolla, California, USA. <sup>3</sup>Department of Chemistry, The Scripps Research Institute, 10550 North Torrey Pines Road, La Jolla, California, USA. <sup>4</sup>Present address: Department of Biological Sciences, Department of Chemical Sciences, Indian Institute of Science Education and Research, Kolkata, India. <sup>5</sup>These authors contributed equally to this work. Correspondence should be addressed to Q.Z.

([qinghai@scripps.edu](mailto:qinghai@scripps.edu))

| Supplementary Figures   | Title                                                                                                                |
|-------------------------|----------------------------------------------------------------------------------------------------------------------|
| Supplementary Figure 1  | Fourier transform infrared (FTIR) spectrum of BP-1                                                                   |
| Supplementary Figure 2  | EM images of designed peptides preserved in negative stain                                                           |
| Supplementary Figure 3  | Negative stain EM of BP-1 at gradually decreased concentrations                                                      |
| Supplementary Figure 4  | ATPase activity of MsbA in BP-1, SP1D1/dimyristoylphosphatidylcholine nanodiscs, or UDM                              |
| Supplementary Figure 5  | Stability of bR in BPs                                                                                               |
| Supplementary Figure 6  | Stability of KcsA in BP-1 compared to in detergents and lipid nanodiscs                                              |
| Supplementary Figure 7  | Stability of wild-type GLR monitored by CPM fluorescence thermal denaturation assay                                  |
| Supplementary Figure 8  | EM images of MsbA during dialysis                                                                                    |
| Supplementary Figure 9  | CD characterization of BP-1 in the MsbA sample                                                                       |
| Supplementary Figure 10 | Random conical tilt pairs of MsbA in BP-1 preserved in negative stain                                                |
| Supplementary Figure 11 | Random conical tilt reconstructions of three MsbA conformations and according fourier shell correlation (FSC) curves |
| Supplementary Figure 12 | Negative staining EM images and ATPase activity of MsbA solubilized in novel amphiphiles                             |

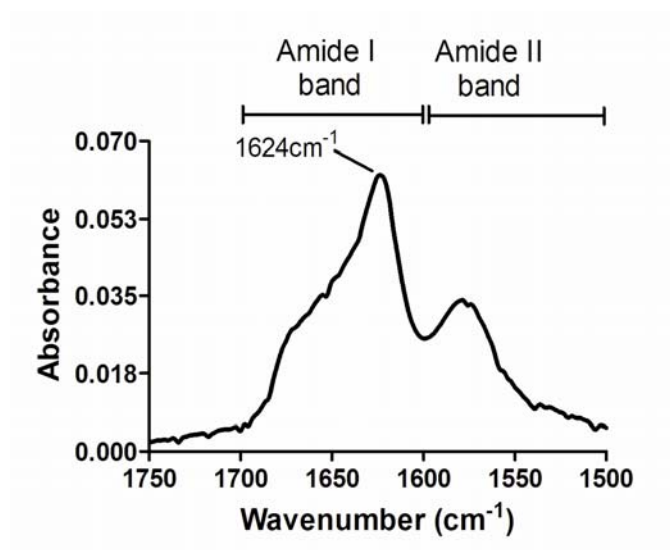

**Supplementary Figure 1.** Fourier transform infrared (FTIR) spectrum of BP-1. The presence of a major peak (1624 cm<sup>-1</sup>) in the amide I band (1700 – 1600 cm<sup>-1</sup>) of BP-1 indicated the formation of  $\beta$ -sheet secondary structures<sup>1</sup>.

- 1 Adochitei, A. & Drochioiu, G. Rapid Characterization of Peptide Secondary Structure by FT-IR Spectroscopy. *Rev. Roum. Chim.* **56**, 783-791 (2011).

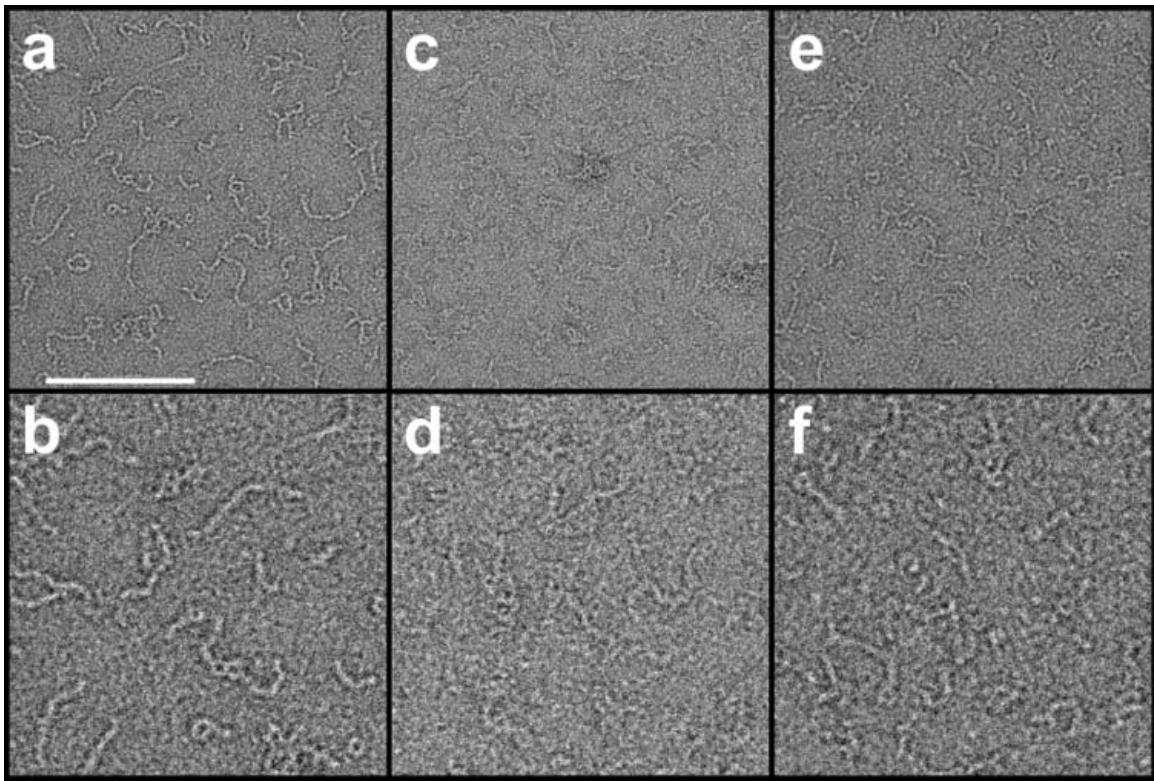

**Supplementary Figure 2.** EM images of designed peptides preserved in negative stain. **(a-b)** BP-1, **(c-d)** BP-2, **(e-f)** BP-3. Scale bar in upper panel represents 100 nm, and images in lower panels are shown at twofold magnification relative to upper panels.

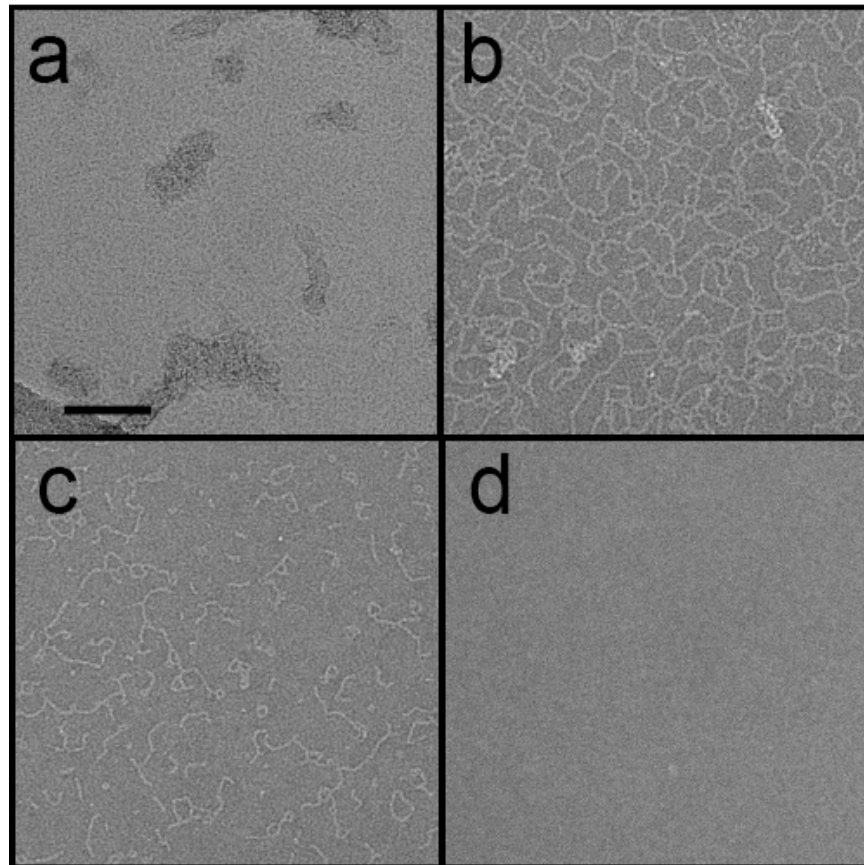

**Supplementary Figure 3.** Negative stain EM of BP-1 at gradually decreased concentrations. **(a)** BP-1 at 2.5 mM. The filaments cover the entire carbon surface of the grid in multiple layers and significant clustering is visible. Upon dilution **(b)**, 1 to 10; **(c)**, 1 to 100) the number of filaments and clustering gradually decreases as they evenly spread out on the carbon grid. The control with BP1-free buffer **(d)** does not show any of the described filaments but a clean carbon background. Scale bar represents 50nm.

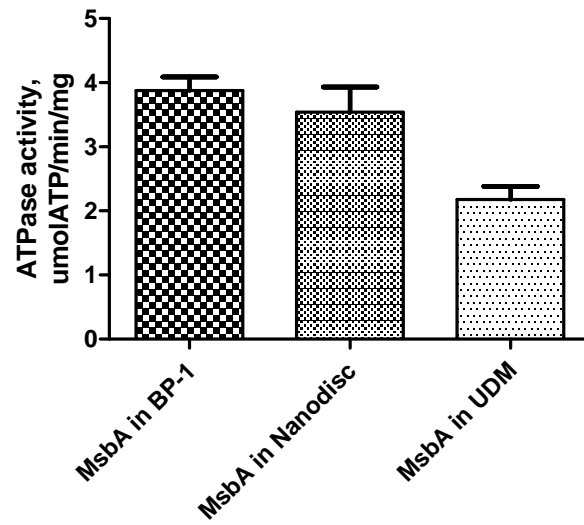

**Supplementary Figure 4.** ATPase activity of MsbA in BP-1, SP1D1/dimyristoylphosphatidylcholine nanodiscs, or UDM. Data represent an average of >10 measurements from different preparations with means  $\pm$  standard error shown.

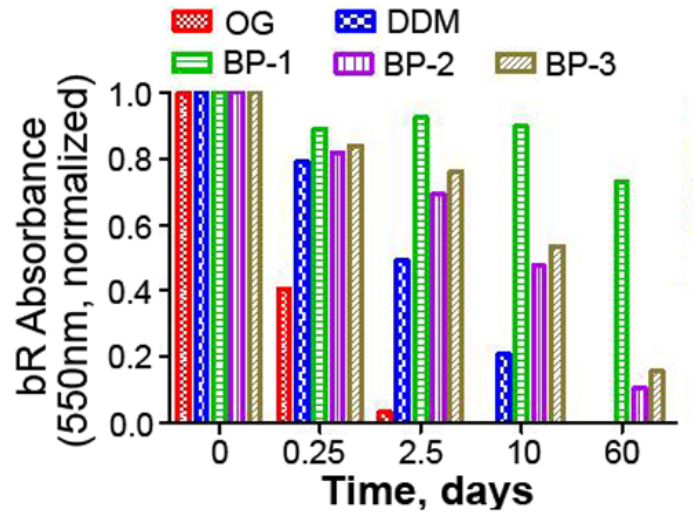

**Supplementary Figure 5.** Stability of bR in BPs. bR stability in  $\beta$ -D-octylglucoside (OG),  $\beta$ -D-dodecylmaltoside (DDM) or BPs in pH 7.4 buffer (100 mM Tris, 40 mM NaCl) at 37 °C. After first recording characteristic bR absorption spectra,  $A_{550}$  was measured periodically; normalized values are plotted.

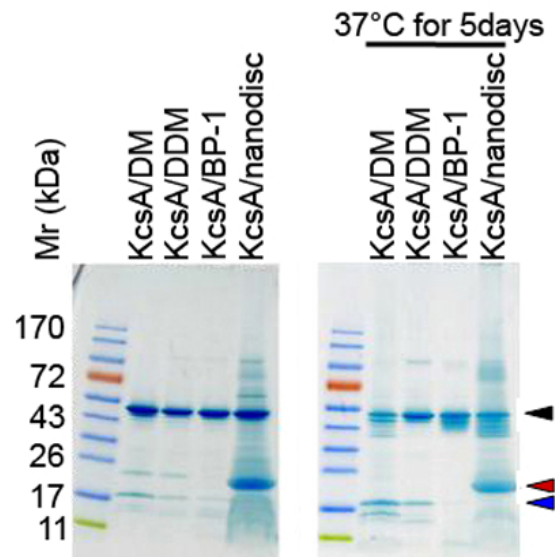

**Supplementary Figure 6.** Stability of KcsA in BP-1 compared to in detergents and lipid nanodiscs. SDS-PAGE gels show KcsA species before (left) and after 5 days incubation at 37°C (right) in  $\beta$ -D-decylmaltoside (DM), DDM, BP-1 or MSP1D1/dimyristoylphosphatidylcholine nanodiscs. KcsA in BP-1 or nanodiscs showed less monomer appearance than in detergents. Arrows denote KcsA tetramer (~54 kDa), KcsA monomer (~18 kDa), and MSP1D1 (~22 kDa). Bands underneath the major tetramer band represent C-terminal proteolysis products<sup>2</sup>.

- 2 Cortes, D. M. & Perozo, E. Structural dynamics of the *Streptomyces lividans* K<sup>+</sup> channel (SKC1): oligomeric stoichiometry and stability. *Biochemistry* **36**, 10343-10352 (1997).

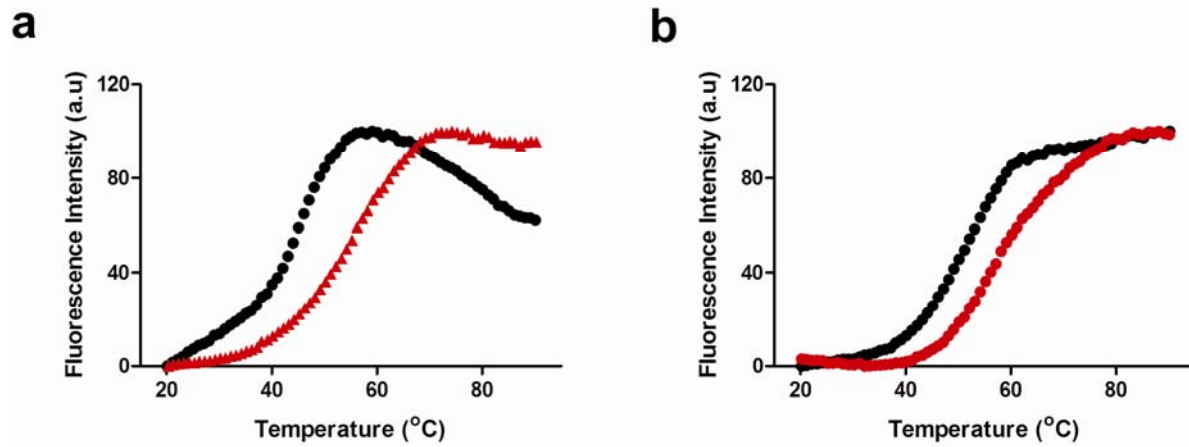

**Supplementary Figure 7.** Stability of wild-type GLR monitored by CPM fluorescence thermal denaturation assay. **(a)** GLR purified in DDM/CHS was diluted 20-fold into the same buffer containing DDM (0.84 mM) or BP-1 (0.50 mM). Thermal transition temperatures ( $T_m$ ) were measured as  $43.5 \pm 0.4$  °C and  $55.4 \pm 1.6$  °C for GLR/DDM (black) and GLR/BP-1 (red), respectively. **(b)** GLR/BP-1 sample was prepared by dialysis from the UDM/CHS preparation.  $T_m$  values for the GLR sample before (black) and after (red) dialysis were  $50.8 \pm 0.1$  °C and  $57.0 \pm 2.4$  °C, respectively.



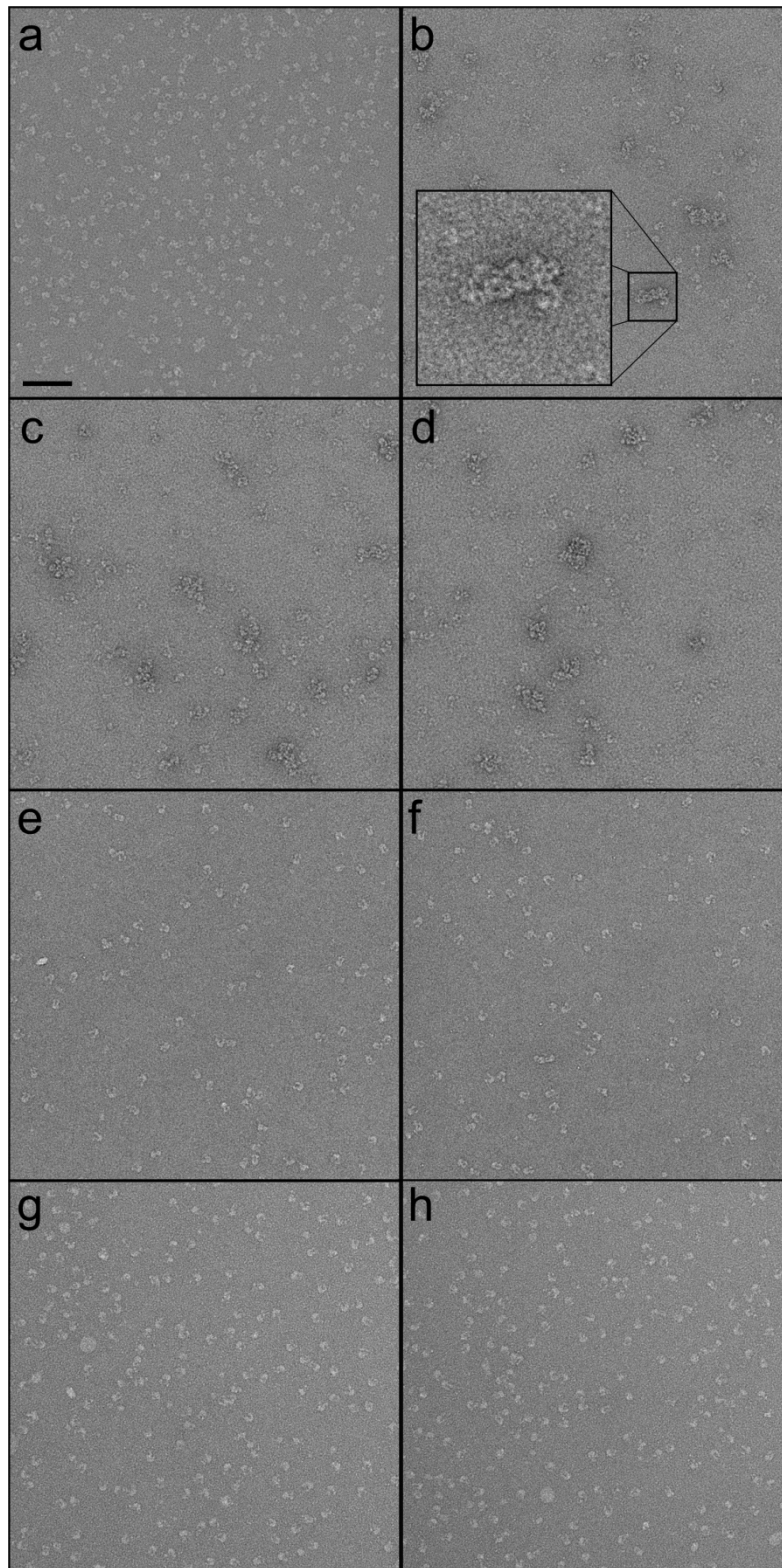

**Supplementary Figure 8.** EM images of MsbA during dialysis. **(a)** BP-1 preserved MsbA after 48h of dialysis compared to **(b-d)** MsbA in UDM prior to dialysis. While individual MsbA particles are identifiable in UDM the majority are in clusters (see inset in **b**) along with high detergent background. After 30 min of dialysis **(e-f)** the number of isolated particles is enhanced and the clustering is reduced. After 360 min **(g-h)** the particle count is increased, likely due to further reduced clustering or enhanced staining of MsbA/BP-1. Scale bar represents 50nm.

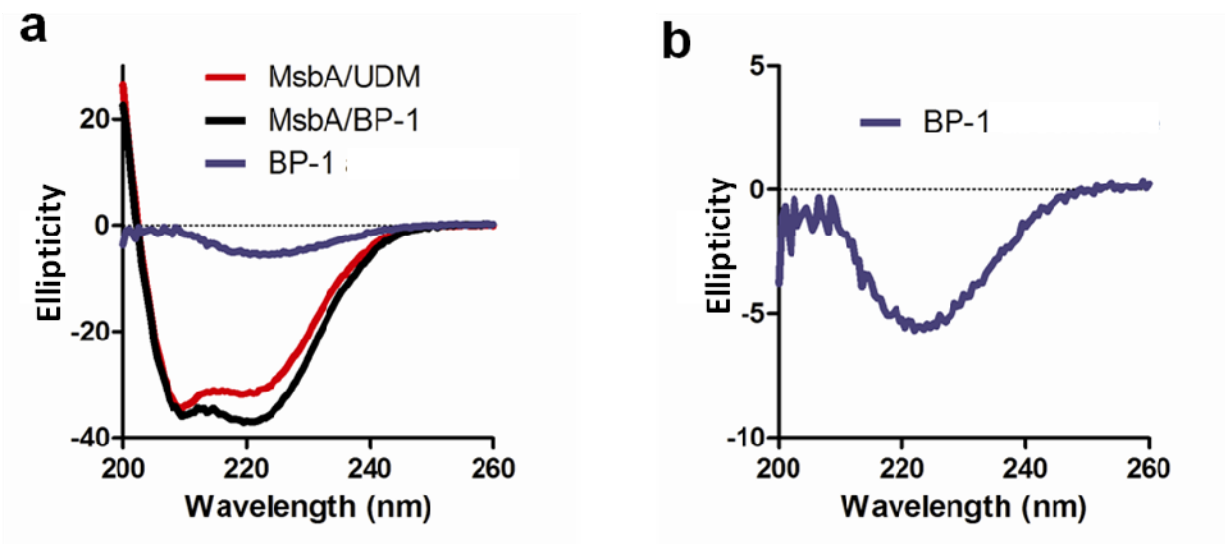

**Supplementary Figure 9.** CD characterization of BP-1 in the MsbA sample. **(a)** CD spectra of MsbA/UDM (red) and MsbA/BP-1 (black, BP-1 : MsbA ~ 30 : 1 molar ratio). Ellipticity difference (blue) between the two samples, wherein the concentration of MsbA is the same (0.2 mg/mL), is contributed by BP-1. Little background signal from UDM and buffers was corrected. **(b)** Zoom-in on the BP-1 spectrum in **(a)**.

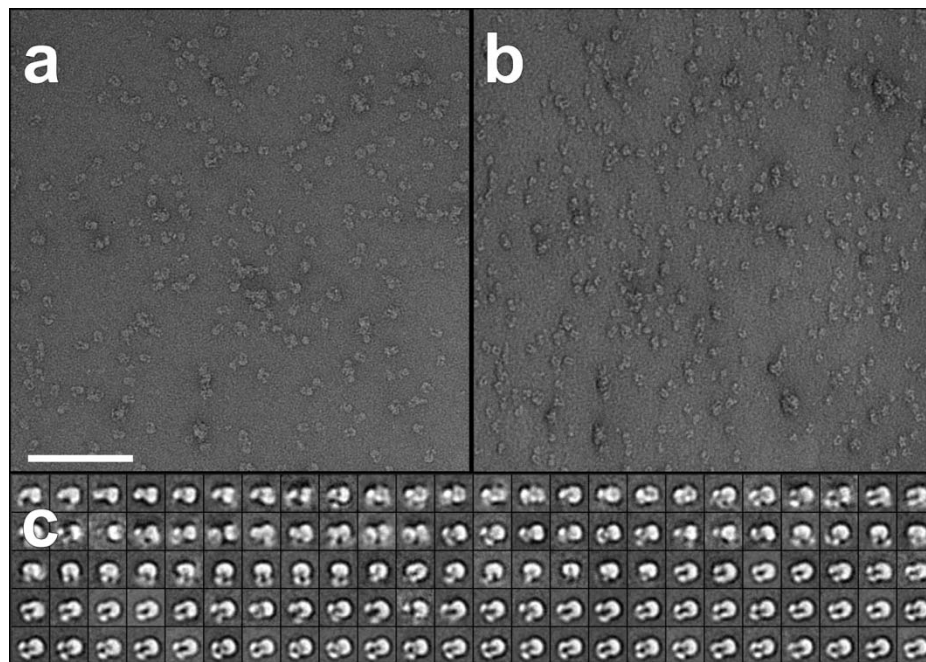

**Supplementary Figure 10.** Random conical tilt pairs of MsbA in BP-1 preserved in negative stain. **(a-b)** corresponding tilt pairs at  $0^\circ$  and  $-55^\circ$  stage tilt. Scale bar represents 100 nm. **(c)** 120 class averages, generated from automatically selected particles using reference free procedures, show multiple MsbA conformers with the two NBDs separated at varied distances.

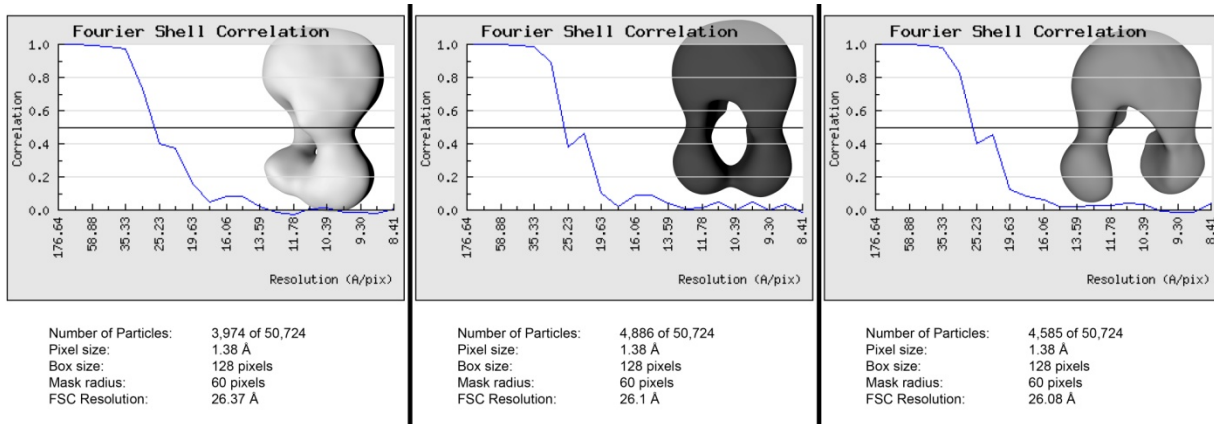

**Supplementary Figure 11.** Random conical tilt reconstructions of three MsbA conformations and according fourier shell correlation (FSC) curves. The FSC resolution (0.5) and particle numbers used for the reconstitution are listed.

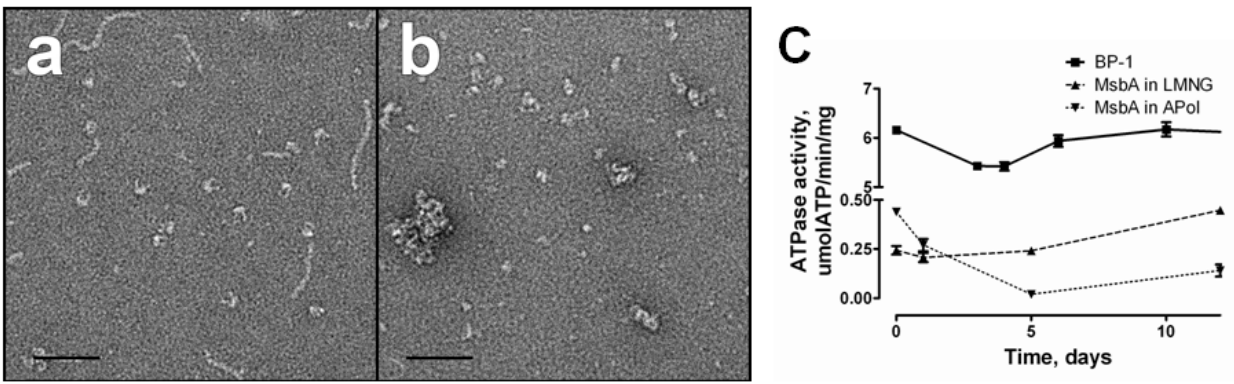

**Supplementary Figure 12.** Negative staining EM images and ATPase activity of MsbA solubilized in novel amphiphiles. **(a)** Representative EM images of MsbA purified in lauryl maltose neopentyl glycol (LMNG). String-like LMNG detergent background objects were observed, along with well-stained MsbA particles. **(b)** Representative EM images of MsbA reconstituted in Amphipol A8-35. Significant aggregation was evident, and MsbA structural details were difficult to discern. **(c)** MsbA was stable in LMNG over 12 days of incubation at RT, but less stable in Amphipol A8-35, based on periodic ATPase activity measurement. Additionally, relatively low MsbA ATPase activity was detected in LMNG or Amphipol A8-35 compared to BP-1.
